# Supplementary material for: Strontium-doped RuO2 electrocatalyst with abundant oxygen vacancies for boosting OER performance
Source: Royal Society of Chemistry journal article supplement (doi:10.1039/d4qi02070g), 2024-01-01
Supplement: d4qi02070g1.pdf [file d4qi02070g1.pdf]

## Supporting Information

# Strontium doping RuO<sub>2</sub> electrocatalyst with abundant oxygen vacancies for boosting OER performance

Bei An<sup>a</sup>, Xiaoqian Li<sup>a</sup>, Yuan Lin<sup>a</sup>, Fanfan Shang<sup>a</sup>, Huijie He<sup>a</sup>, Hairui Cai<sup>a</sup>, Xiaoxiao Zeng<sup>a</sup>, Weitong Wang<sup>a</sup>, Shengchun Yang<sup>\*a,b,c</sup>, Bin Wang<sup>\*a,b,c</sup>

<sup>a</sup> MOE Key Laboratory for Non-equilibrium Synthesis and Modulation of Condensed Matter, Key Laboratory of Shaanxi for Advanced Materials and Mesoscopic Physics, State Key Laboratory for Mechanical Behavior of Materials, School of Physics, Xi'an Jiaotong University, No. 28 West Xianning Road, Xi'an 710049, China

<sup>b</sup> National Innovation Platform (Center) for Industry-Education Integration of Energy Storage Technology, Xi'an Jiaotong University, No. 28 West Xianning Road, Xi'an 710049, China

<sup>c</sup> Shaanxi Collaborative Innovation Center for Hydrogen Fuel Cell Performance Improvement, Xi'an Jiaotong University, No. 28 West Xianning Road, Xi'an 710049, China

E-mail: ysch1209@mail.xjtu.edu.cn; bin\_wang@xjtu.edu.cn

---

## Experimental Section

Chemicals and Materials: Ruthenium chloride hydrate ( $\text{RuCl}_3$ , 99.99%) was purchased from J&K Scientific. Ethylene glycol ( $(\text{CH}_2\text{OH})_2$ ) was purchased from Tianjin Fuyu Fine Chemical Co., Ltd. Strontium nitrate ( $\text{Sr}(\text{NO}_3)_2$ , 99.5%), citric acid ( $\text{C}_6\text{H}_8\text{O}_7$ ) and ethanol absolute ( $\text{C}_2\text{H}_6\text{O}$ ) were purchased from Sinopharm Chemical. Nafion (5 wt%, DuPont) was purchased from commercial suppliers. The Milli-Q water of  $18.2 \text{ M}\Omega \cdot \text{cm}$  was used in all experiments. All chemicals were used directly without further purification.

Synthesis of Sr-doped  $\text{RuO}_2$ : The samples of Sr-doped  $\text{RuO}_2$  were prepared by the sol-gel method followed by a calcination treatment. Briefly, 18 mg of  $\text{RuCl}_3$  was first dissolved in 1 mL 0.5%vol  $\text{C}_2\text{H}_6\text{O}$  solution. Then, 1 mL solution containing 2.1 mg  $\text{Sr}(\text{NO}_3)_2$  and 21 mg of  $\text{C}_6\text{H}_8\text{O}_7$  was added into the above  $\text{RuCl}_3$  solution under stirring to form a homogeneous solution, and the mixture was evaporated to dryness with continuous stirring at  $150 \text{ }^\circ\text{C}$ . Finally, the obtained solid sample was calcinated in the furnace at different temperatures (*i.e.*,  $350 \text{ }^\circ\text{C}$ ,  $450 \text{ }^\circ\text{C}$ ,  $550 \text{ }^\circ\text{C}$ , respectively). After cooling to room temperature, the synthesized samples were collected and assigned as  $\text{Sr}_{0.1}\text{RuO}_x\text{-T}$  ( $T = 350, 450, \text{ and } 550$ , respectively). The reference sample of  $\text{RuO}_2$  was prepared *via* the same method except for the addition of  $\text{Sr}(\text{NO}_3)_2$  during the synthesis process.

Physicochemical characterizations: The powder X-ray diffraction (PXRD) analysis of the samples was conducted by using a Bruker D8 ADVANCE instrument equipped with Cu  $K\alpha$  radiation ( $\lambda=1.5418 \text{ \AA}$ ) operating at 40 kV and 40 mA. The morphologies

---

of the samples were examined by using a scanning electron microscope (SEM). For SEM imaging, the samples were prepared by mounting the powder onto a conductive adhesive tape. The microstructures and morphology were further investigated by using transmission electron microscopy (TEM) with a JEOL JEM-F200 instrument, as well as high-angle annular dark-field scanning transmission electron microscopy (HAADF-STEM). In the case of TEM analysis, specimens were prepared by applying a dispersion of the sample onto a TEM grid. X-ray photoelectron spectroscopy (XPS) analysis was performed using the Thermo Fisher Scientific ESCALAB Xi+ spectrometer, employing a monochromatic Al K $\alpha$  source with an energy of 1486.6 eV. The binding energy was calibrated by using the C 1s peak at 284.8 eV.

Electrochemical measurements: All the electrochemical testing was conducted in a three-electrode cell using a Cerrtest electrochemical workstation at 25 °C. The electrolyte was 0.5 M H<sub>2</sub>SO<sub>4</sub> solution. During the electrochemical testing, an ink solution was prepared by adding 5 mg of catalyst into a solution containing 780  $\mu$ L ethanol, 200  $\mu$ L deionized water, and 20  $\mu$ L Nafion. The resulting solution was subjected to ultrasonication for 30 minutes under an ice bath to ensure the formation of a homogeneous ink. The OER activity was measured by applying 5  $\mu$ L of the ink onto a glassy carbon electrode, which served as the working electrode. A carbon rod was used as the counter electrode, while a saturated Hg/Hg<sub>2</sub>SO<sub>4</sub> electrode served as the reference electrode. The OER activity was measured *via* linear sweep voltammetry (LSV), Tafel slope, and electrochemical impedance spectroscopy (EIS). The linear sweep voltammetry (LSV) was performed with a scan rate of 5 mV/s and 80% iR

---

correction. The Tafel plots were obtained from the LSV curves by fitting the linear portion of the Tafel plots. Electrochemical impedance spectroscopy (EIS) measurements were recorded in a frequency range from 0.1 to  $10^4$  Hz with an AC amplitude of 10 mV. The double-layer capacitances ( $C_{dl}$ ) were calculated based on cyclic voltammetry (CV) curves, which were obtained by scanning the potential from 1.025 V - 1.125V vs. RHE (reversible hydrogen electrode), and the scanning rates were 5 mV/s, 25 mV/s, 50 mV/s, 75 mV/s, and 100 mV/s, respectively. The pH-dependence experiment was measured in electrolytes with different pHs, *i.e.*, 0.5 M H<sub>2</sub>SO<sub>4</sub> (pH=0), 0.05 M H<sub>2</sub>SO<sub>4</sub> (pH=1), and 0.005 M H<sub>2</sub>SO<sub>4</sub> (pH=2), respectively. The same potential window was chosen of 1.1 V (vs. RHE) -1.5 V (vs. RHE). The OER stability was evaluated using a catalyst-loaded carbon cloth as the working electrode. To assess stability more comprehensively, a proton exchange membrane (PEM) electrolysis device was employed, 3 mg of as-prepared catalyst and 1.5 mg of commercial Pt/C were added to CP ( $1.5 \times 1.5$  cm), which served as the anode and cathode respectively, and the Nafion membrane (12  $\mu$ m thick) acting as the solid polymer electrolyte. During the test, the electrolyte solution was supplied by a peristaltic pump. All potential was converted using the formula:  $E_{RHE} = E_{Hg/Hg_2SO_4} + 0.652 \text{ V} + 0.059 \times \text{pH}$ .

### **DFT calculations**

All density functional theory (DFT) calculations were performed by using the Vienna Ab Initio Simulation Package (VASP).<sup>24,25</sup> To investigate the effects of Sr doping and oxygen vacancies, the models of Sr<sub>0.1</sub>RuO<sub>2</sub>, Sr<sub>0.1</sub>RuO<sub>x</sub>, and RuO<sub>2</sub> were built based on RuO<sub>2</sub> (110) planes. To ensure an appropriate surface vacuum, a vacuum layer

---

with a thickness of 15 Å was included in the vertical c-axis direction of the catalytic surfaces. A Monkhorst-Pack k-point mesh of 3×3×1 was employed for the model. Electron-electron and electron-ion interactions were described using the generalized gradient approximation (GGA) with the Perdew-Burke-Ernzerhof (PBE) functional.<sup>26</sup> The energy cut-off for the plane-wave basis set was set to 450 eV. The convergence criteria after relaxation is less than 10<sup>-5</sup> eV atom<sup>-1</sup>. The maximum number of steps for the electron self-consistent cycle was 60. During the structure optimization, the atoms in the top three layers of the surface were allowed to relax, while the atoms in the subsequent three layers were kept fixed to mimic the bulk behavior. The reaction Van der Waals interactions were taken into account when calculating the adsorption energies. The reaction path follows AEM as below:

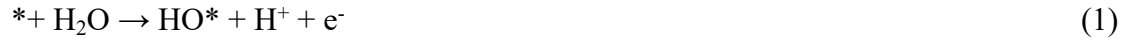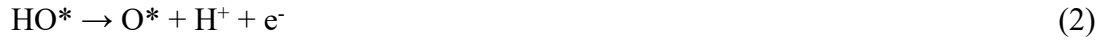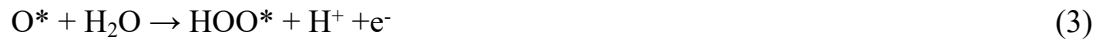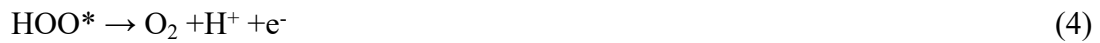

In the above equation, the \* represents the catalytic active site; H<sub>2</sub>O, HO\*, O\*, and HOO\* are the reaction intermediates. The Gibbs free energy changes are calculated using the equations:

$$\Delta G_{\text{ads}} = \Delta E_{\text{ads}} + \Delta \text{ZPE} - T\Delta S \quad (5)$$

Where  $\Delta G_{\text{ads}}$ ,  $\Delta E_{\text{ads}}$ ,  $\Delta \text{ZPE}$ , and  $\Delta S$  represent the Gibbs free energy changes, the binding energy, zero-point energy changes, and entropy changes of the adsorption process, respectively.

---

All calculations were performed at 298.15 K.

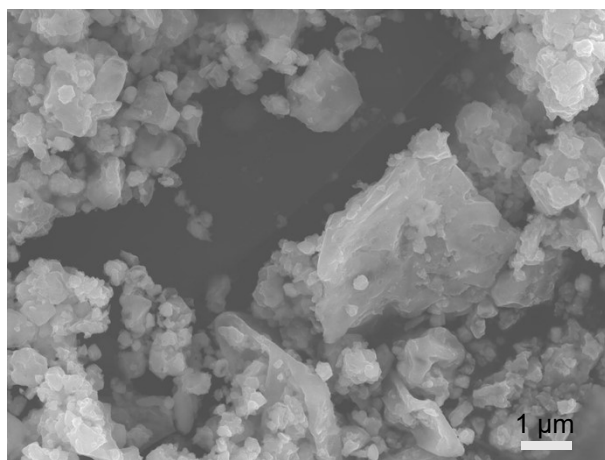

**Fig. S1.** SEM image of Sr<sub>0.1</sub>RuO<sub>x</sub>-450.

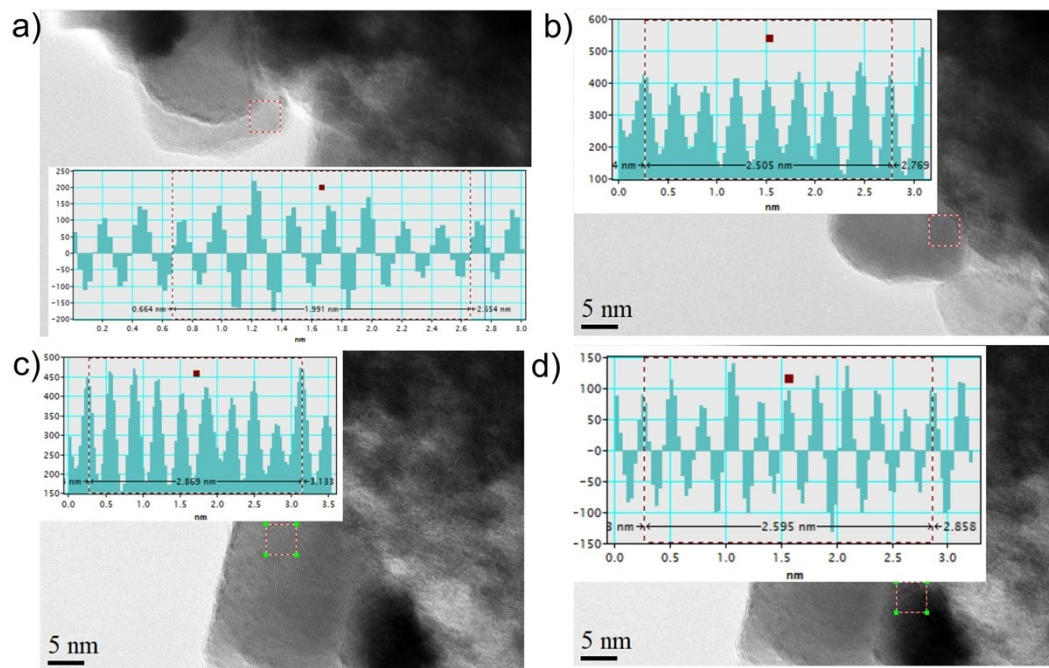

**Fig. S2.** The FFT inverse of a) RuO<sub>2</sub> (101) plane; b) RuO<sub>2</sub> (110) plane; c) Sr<sub>0.1</sub>RuO<sub>x</sub> (110) plane; d) Sr<sub>0.1</sub>RuO<sub>x</sub> (101) plane.



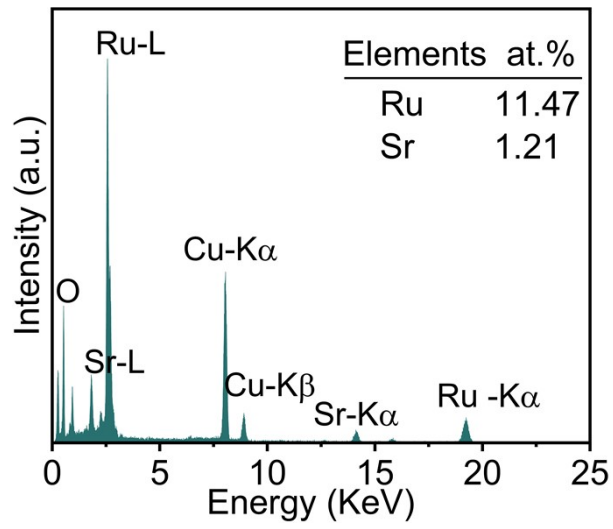

**Fig. S3.** EDS spectra of Sr, Ru, and O elements in the  $\text{Sr}_{0.1}\text{RuO}_x$ -450.

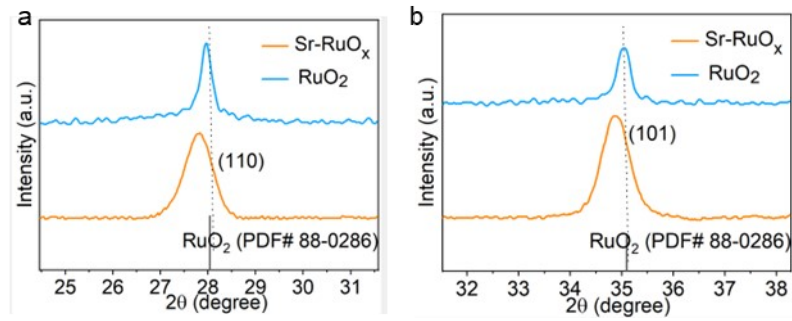

**Fig. S4.** PXRD pattern of the a) (110) plane and b) (101) plane for Sr<sub>0.1</sub>RuO<sub>x</sub>-450 and RuO<sub>2</sub>.

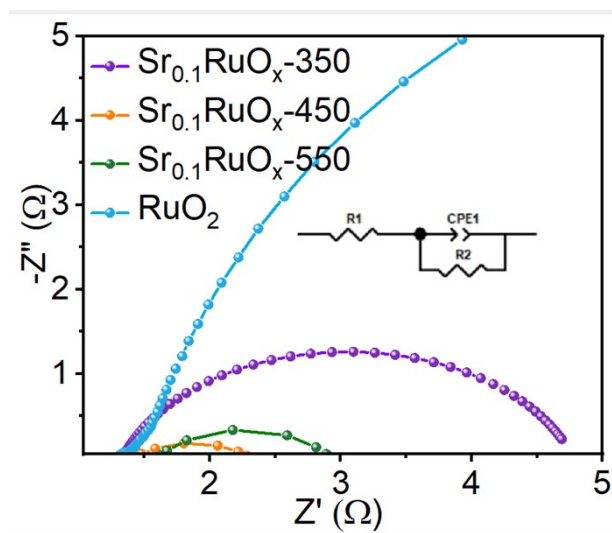

**Fig. S5.** EIS plots for  $\text{RuO}_2$ ,  $\text{Sr}_{0.1}\text{RuO}_x$ -350,  $\text{Sr}_{0.1}\text{RuO}_x$ -450 and  $\text{Sr}_{0.1}\text{RuO}_x$ -550.

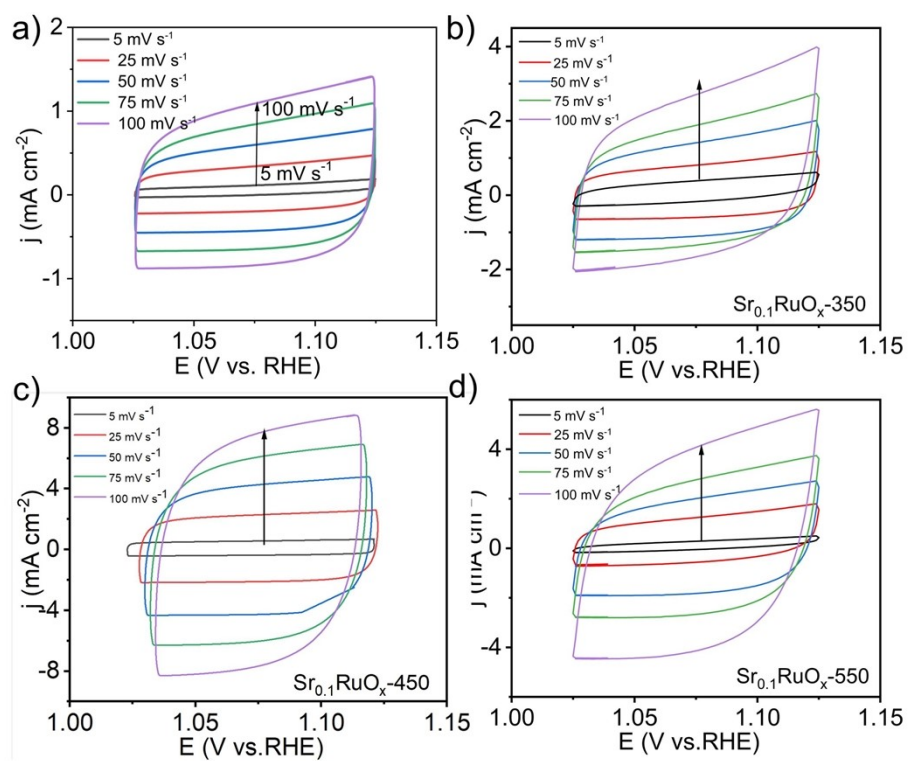

**Fig. S6.** Cyclic voltammety curves for a)  $\text{RuO}_2$ , b)  $\text{Sr}_{0.1}\text{RuO}_x\text{-350}$ , c)  $\text{Sr}_{0.1}\text{RuO}_x\text{-450}$ , d)  $\text{Sr}_{0.1}\text{RuO}_x\text{-550}$ , respectively.

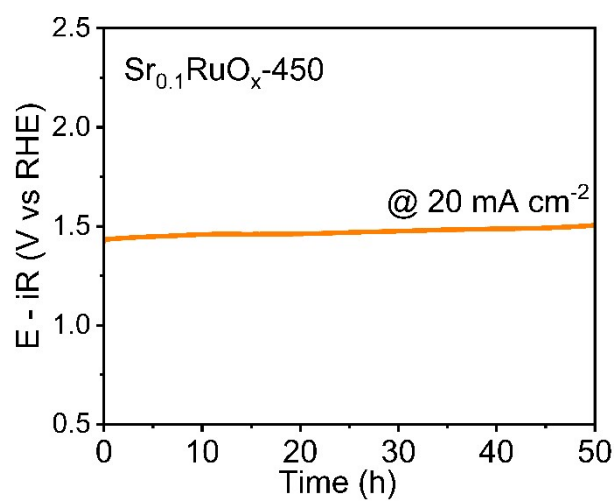

**Fig. S7.** Chronopotentiometry test of  $\text{Sr}_{0.1}\text{RuO}_x$ -450 at the current density of  $20 \text{ mA cm}^{-2}$ .

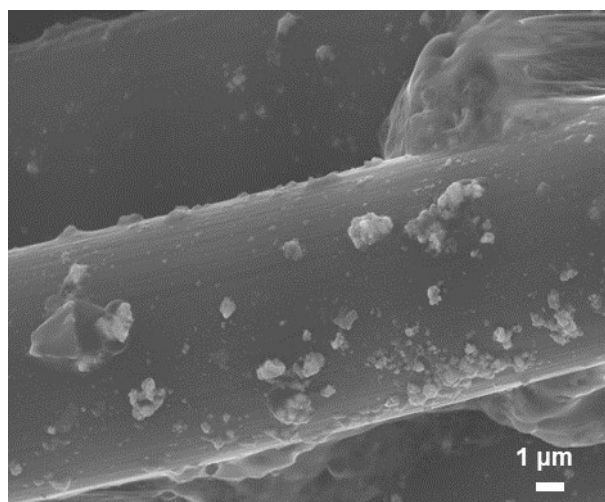

**Fig. S8.** The SEM on the carbon cloth after 100 h CP test.

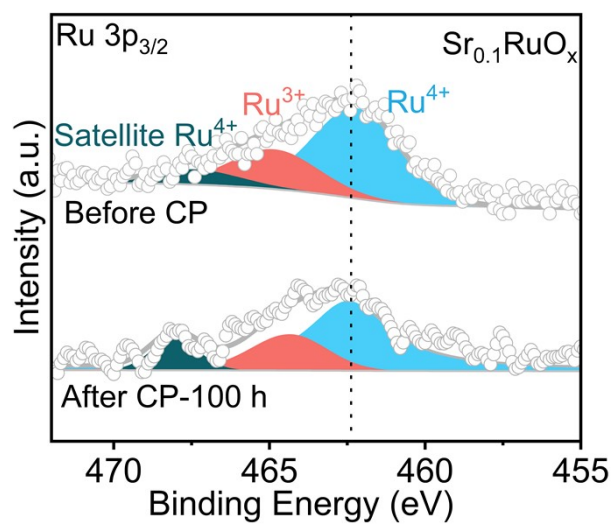

**Fig. S9.** Ru 3p XPS spectra of the Sr<sub>0.1</sub>RuO<sub>x</sub>-450 before and after the chronopotentiometry test.

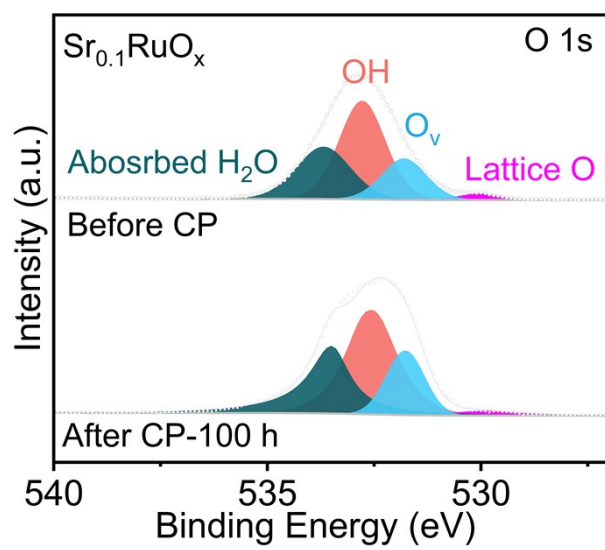

**Fig. S10.** O 1s XPS spectra of the  $\text{Sr}_{0.1}\text{RuO}_x$ -450 before and after the chronopotentiometry test.



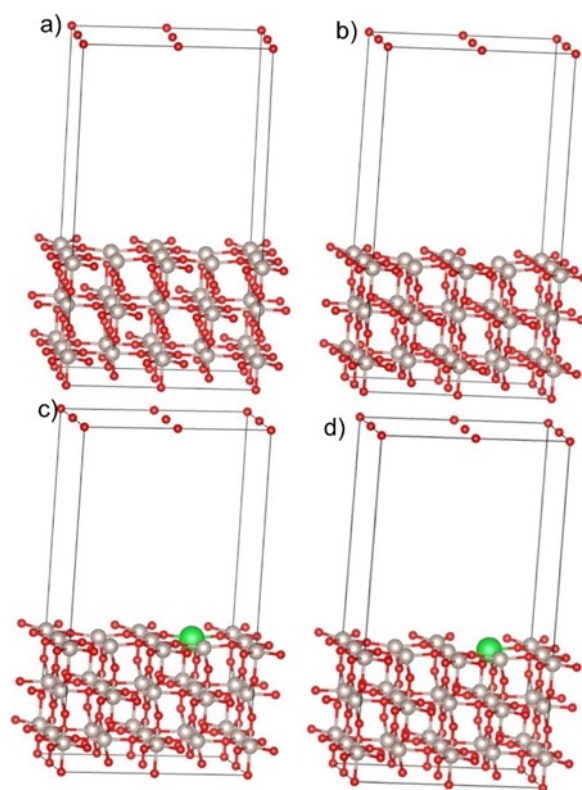

**Fig. S11.** The models of a) RuO<sub>2</sub>, b) the RuO<sub>2</sub> with oxygen vacancies (RuO<sub>x</sub>), c) the Sr doping RuO<sub>2</sub> (Sr<sub>0.1</sub>RuO<sub>2</sub>), and d) Sr<sub>0.1</sub>RuO<sub>2</sub> with O vacancies (Sr<sub>0.1</sub>RuO<sub>x</sub>).

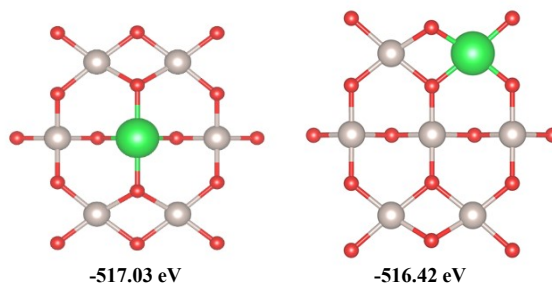

**Fig. S12.** Sr doped RuO<sub>2</sub> with different coordination.

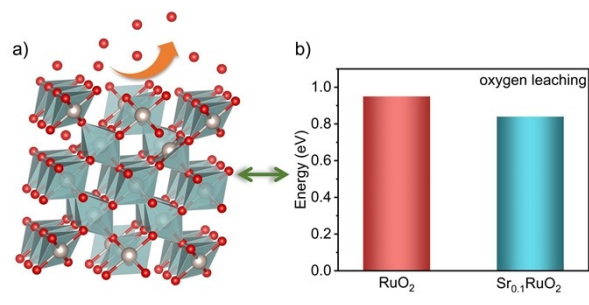

**Fig. S13.** a) The diagram of oxygen vacancy leaching; b) The  $\Delta G_{\text{O vacancy}}$  for RuO<sub>2</sub> and Sr<sub>0.1</sub>RuO<sub>2</sub>.

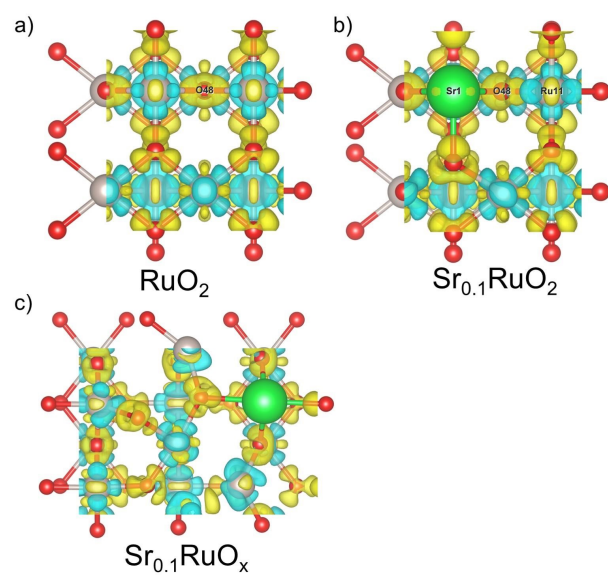

**Fig. S14.** The charge energy difference of a)  $\text{RuO}_2$ , b)  $\text{Sr}_{0.1}\text{RuO}_2$ , and c)  $\text{Sr}_{0.1}\text{RuO}_x$ ; yellow and blue regions represent electron accumulation and depletion, respectively.

---

**Table S1.** Crystal parameters for RuO<sub>2</sub> and Sr<sub>0.1</sub>RuO<sub>x</sub>-450.

| Sample                                  | Ru-O (Å) | Ru-Ru (Å) | O-Ru-O(°) |
|-----------------------------------------|----------|-----------|-----------|
| RuO <sub>2</sub>                        | 2.02     | 3.14      | 93.81     |
| Sr <sub>0.1</sub> RuO <sub>x</sub> -450 | 2.06     | 3.18      | 97.11     |

**Table S2.** Results of deconvolution of the Ru 3p<sub>3/2</sub> XPS spectra of different catalysts in Figure 2c.

|                                       | <b>RuO<sub>2</sub></b> |                  |                      | <b>Sr<sub>0.1</sub>RuO<sub>x</sub>-450</b> |                  |                      |
|---------------------------------------|------------------------|------------------|----------------------|--------------------------------------------|------------------|----------------------|
|                                       | Ru <sup>4+</sup>       | Ru <sup>3+</sup> | Sat.Ru <sup>4+</sup> | Ru <sup>4+</sup>                           | Ru <sup>3+</sup> | Sat.Ru <sup>4+</sup> |
| <b>Peak position (eV)</b>             | 462.1                  | 464.7            | 467.1                | 462.3                                      | 464.9            | 467.4                |
| <b>FWHE (eV)</b>                      | 2.8                    | 2.78             | 3.32                 | 2.83                                       | 2.78             | 3.21                 |
| <b>Peak areas</b>                     | 26744.3                | 16159.6          | 4059.5               | 2082.2                                     | 913.4            | 348.3                |
| <b>Proportion(to Ru<sup>4+</sup>)</b> | 1.65                   | 1                | 0.25                 | 2.28                                       | 1                | 0.38                 |

  

| <b>Sr<sub>0.1</sub>RuO<sub>x</sub>-450 (after CP-100 h)</b> |                  |                  |                      |
|-------------------------------------------------------------|------------------|------------------|----------------------|
|                                                             | Ru <sup>4+</sup> | Ru <sup>3+</sup> | Sat.Ru <sup>4+</sup> |
| <b>Peak position (eV)</b>                                   | 462.5            | 464.4            | 468.0                |
| <b>FWHE (eV)</b>                                            | 3.0              | 2.8              | 1.9                  |
| <b>Peak areas</b>                                           | 937.4            | 360.1            | 169.5                |
| <b>Proportion(to Ru<sup>4+</sup>)</b>                       | 2.63             | 1                | 0.47                 |

**Table S3.** Results of deconvolution of the O 1s XPS spectra of different catalysts in the Figure 2d.

|                                        | <b>RuO<sub>2</sub></b> |                |                 |                  | <b>Sr<sub>0.1</sub>RuO<sub>x</sub>-450</b> |                |                 |                  |
|----------------------------------------|------------------------|----------------|-----------------|------------------|--------------------------------------------|----------------|-----------------|------------------|
|                                        | O <sub>L</sub> -Ru     | O <sub>v</sub> | O <sub>OH</sub> | H <sub>2</sub> O | O <sub>L</sub> -Ru                         | O <sub>v</sub> | O <sub>OH</sub> | H <sub>2</sub> O |
| <b>Peak position (eV)</b>              | 530.2                  | 531.8          | 532.8           | 533.9            | 529.8                                      | 531.7          | 532.3           | 533.7            |
| <b>FWHE (eV)</b>                       | 0.96                   | 1.38           | 1.32            | 1.54             | 1.02                                       | 1.38           | 1.42            | 1.33             |
| <b>Peak areas</b>                      | 14935.9                | 48707.9        | 34670.8         | 6669.4           | 2005.5                                     | 13580.3        | 33402.8         | 20688            |
| <b>Proportion(to O<sub>L</sub>-Ru)</b> | 1                      | 3.26           | 2.32            | 0.45             | 1                                          | 6.77           | 16.66           | 10.31            |

---

**Table S4.** EIS fitting results of the components of the circuit shown in Figure 3d.

| Catalysts       | Sr <sub>0.1</sub> RuO <sub>x</sub> -350<br>/ Error(%) | Sr <sub>0.1</sub> RuO <sub>x</sub> -450<br>/ Error(%) | Sr <sub>0.1</sub> RuO <sub>x</sub> -550<br>/ Error(%) | RuO <sub>2</sub><br>/ Error(%) |
|-----------------|-------------------------------------------------------|-------------------------------------------------------|-------------------------------------------------------|--------------------------------|
| R <sub>s</sub>  | 1.6 / 0.47%                                           | 1.33 / 1.7%                                           | 1.6 / 0.84%                                           | 1.34 / 0.52%                   |
| R <sub>ct</sub> | 3.44 / 1.15%                                          | 0.9 / 7.38%                                           | 1.33 / 4.45%                                          | 12.76 / 0.91%                  |
| CPE-T           | 0.03 / 3.30%                                          | 0.08 / 6.72%                                          | 0.019 / 3.83%                                         | 0.012 / 1.70                   |
| CPE-P           | 0.8 / 1.06 %                                          | 0.72 / 4.76 %                                         | 0.49 / 4.15%                                          | 0.89 / 0.53%                   |



**Table S5.** Comparison of overpotentials at 10 mA cm<sup>-2</sup> and Tafel slopes for Sr<sub>0.1</sub>RuO<sub>x</sub>-450 and some reported high-efficient Ru-based electrocatalysts in acid electrolytes.

| Catalysts                                                               | $\eta_{10}$ (mV) | Tafel slope (mV dec <sup>-1</sup> ) | Electrolytes                         | Reference |
|-------------------------------------------------------------------------|------------------|-------------------------------------|--------------------------------------|-----------|
| Sr-RuO <sub>2</sub>                                                     | 190              | 36.4                                | 0.5 M H <sub>2</sub> SO <sub>4</sub> | This work |
| Ru <sub>0.75</sub> Mn <sub>0.2</sub> O <sub>2-<math>\delta</math></sub> | 237              | 54.6                                | 0.5 M H <sub>2</sub> SO <sub>4</sub> | [1]       |
| Co-RuIr                                                                 | 235              | 66.9                                | 0.1 M HClO <sub>4</sub>              | [2]       |
| Mn <sub>0.73</sub> Ru <sub>0.27</sub> O <sub>2-d</sub>                  | 208              | 65.3                                | 0.5 M H <sub>2</sub> SO <sub>4</sub> | [3]       |
| Ru/S NSs                                                                | 219              | 46.1                                | 0.5 M H <sub>2</sub> SO <sub>4</sub> | [4]       |
| Ru/RuO <sub>2</sub> -Co <sub>3</sub> O <sub>4</sub>                     | 226              | 49                                  | 0.1 M HClO <sub>4</sub>              | [5]       |
| RuO <sub>2</sub> /(Co,Mn) <sub>3</sub> O <sub>4</sub>                   | 270              | 77                                  | 0.5 M H <sub>2</sub> SO <sub>4</sub> | [6]       |
| RuMn NSBs                                                               | 196              | 47.3                                | 0.5 M H <sub>2</sub> SO <sub>4</sub> | [7]       |
| B-RuO <sub>2</sub>                                                      | 200              | 55                                  | 0.5 M H <sub>2</sub> SO <sub>4</sub> | [8]       |
| RuNi@G-250                                                              | 227              | 65                                  | 0.5 M H <sub>2</sub> SO <sub>4</sub> | [9]       |
| Y <sub>1.8</sub> Cu <sub>0.2</sub> Ru <sub>2</sub> O <sub>7</sub>       | 258              | 63                                  | 0.5 M H <sub>2</sub> SO <sub>4</sub> | [10]      |
| Ru <sub>1</sub> -N-C                                                    | 267              | 52.6                                | 0.5 M H <sub>2</sub> SO <sub>4</sub> | [11]      |
| Ru <sub>1</sub> -Pt <sub>3</sub> Cu                                     | 220              | 52                                  | 0.5 M H <sub>2</sub> SO <sub>4</sub> | [12]      |
| NPC@RuO <sub>2</sub>                                                    | 220              | 68.6                                | 0.5 M H <sub>2</sub> SO <sub>4</sub> | [13]      |

---

## References

- [1] S. Chen, H. Huang, P. Jiang, K. Yang, J. Diao, S. Gong, S. Liu, M. Huang, H. Wang, Q. Chen, Ruthenium-manganese solid solution oxide with enhanced performance for acidic and alkaline oxygen evolution reaction, *ACS Catal*, 2022, **10**, 1152.
- [2] J. Shan, T. Ling, K. Davey, Y. Zheng, S.-Z. Qiao, Transition-metal-doped RuIr bifunctional nanocrystals for overall water splitting in acidic environments, *Adv. Mater*, 2019, **31**, 1900510.
- [3] K. Wang, Y. Wang, B. Yang, Z. Li, X. Qin, Q. Zhang, L. Lei, M. Qiu, G. Wu, Y. Hou, Highly active ruthenium sites stabilized by modulating electron-feeding for sustainable acidic oxygen-evolution electrocatalysis, *Energy Environ. Sci*, 2022, **15**, 2356.
- [4] L. Liu, Y. Ji, W. You, S. Liu, Q. Shao, Q. Kong, Z. Hu, H. Tao, L. Bu, X. Huang, Trace lattice S inserted RuO<sub>2</sub> flexible nanosheets for efficient and long-term acidic oxygen evolution catalysis, *Small*, 2022, 2208202.
- [5] T. Wang, Z. Li, H. Jang, M. G. Kim, Q. Qin, X. Liu, Interface engineering of oxygen vacancy-enriched Ru/RuO<sub>2</sub>-Co<sub>3</sub>O<sub>4</sub> heterojunction for efficient oxygen evolution reaction in acidic media, *ACS Sustain. Chem. Eng*, 2023, **11**, 5155-5163.
- [6] S. Niu, X.-P. Kong, S. Li, Y. Zhang, J. Wu, W. Zhao, P. Xu, Low Ru loading RuO<sub>2</sub>/(Co,Mn)<sub>3</sub>O<sub>4</sub> nanocomposite with modulated electronic structure for efficient oxygen evolution reaction in acid, *Appl. Catal. B Environ*, 2021, **297**, 120442.
- [7] L. Li, L. Bu, B. Huang, P. Wang, C. Shen, S. Bai, T.-S. Chan, Q. Shao, Z. Hu, X. Huang, Compensating electronic effect enables fast site-to-site electron transfer over ultrathin RuMn nanosheet branches toward highly electroactive and stable water splitting, *Adv. Mater*, 2021, **33**.
- [8] C. Liu, B. Sheng, Q. Zhou, D. Cao, H. Ding, S. Chen, P. Zhang, Y. Xia, X. Wu, L. Song, Motivating Ru-bri site of RuO<sub>2</sub> by boron doping toward high performance acidic and neutral oxygen evolution, *Nano Res*, 2022, **15**, 7008-7015.
- [9] X. Cui, P. Ren, C. Ma, J. Zhao, R. Chen, S. Chen, N. P. Rajan, H. B. Li, L. Yu, Z. q. Tian, D. h. Deng, Robust interface Ru centers for high-performance acidic oxygen evolution, *Adv Mat*, 2020, **32**, 1908126.
- [10] D. A. Kuznetsov, M. A. Naeem, P. V. Kumar, P. M. Abdala, A. Fedorov, C. R. Müller, Tailoring lattice oxygen binding in Ruthenium pyrochlores to enhance oxygen evolution activity, *J. Am. Chem. Soc*, 2020, **142**, 7883-7888.
- [11] L. L. Cao, Q. Lu, J. J. Chen, L. Wang, Y. Lin, H. J. Wang, X. K. Liu, X. y. Shen, W. Zhang, W. Liu, Z. M. Qi, Z. Jiang, J. L. Yang, T. Yao, Dynamic oxygen adsorption on single-atomic Ruthenium catalyst with high performance for acidic oxygen evolution reaction. *Nat Commun*, 2019, **10**, 4849.
- [12] Y. Yao, S. Hu, W. Chen, Z.-Q. Huang, W. Wei, T. Yao, R. Liu, K. Zang, X. Wang, G. Wu, W. Yuan, T. Yuan, B. Zhu, W. Liu, Z. Li, D. He, Z. Xue, Y. Wang, X. Zheng, J. Dong, C.-R. Chang, Y. Chen, X. Hong, J. Luo, S. Wei, W.-X. Li, P. Strasser, Y. Wu, Y. Li, Engineering the electronic structure of single atom Ru sites via

---

compressive strain boosts acidic water oxidation electrocatalysis, *Nat. Catal*, 2019, **2**, 304-313.

[13] J. Y. Yu, G. X. Li, H. Liu, L. L. Zhao, A. z. Wang, Z. Liu, H. d. Li, H. Liu, Y. Y. Hu, W. J. Zhou, Ru–Ru<sub>2</sub>PΦNPC and NPC@RuO<sub>2</sub> synthesized via environment-friendly and solid-phase phosphating process by saccharomycetes as N/P sources and carbon template for overall water splitting in acid electrolyte, *Adv. Functional. Mat*, 2019, **29**, 1901154.
